# Supplementary material for: Validity of Rapid Antibody Testing for COVID-19 Vaccine in Homeless People
Source: MDPI journal article supplement (doi:10.3390/v15061400), 2023-06-20
Supplement: s1 [file s1]

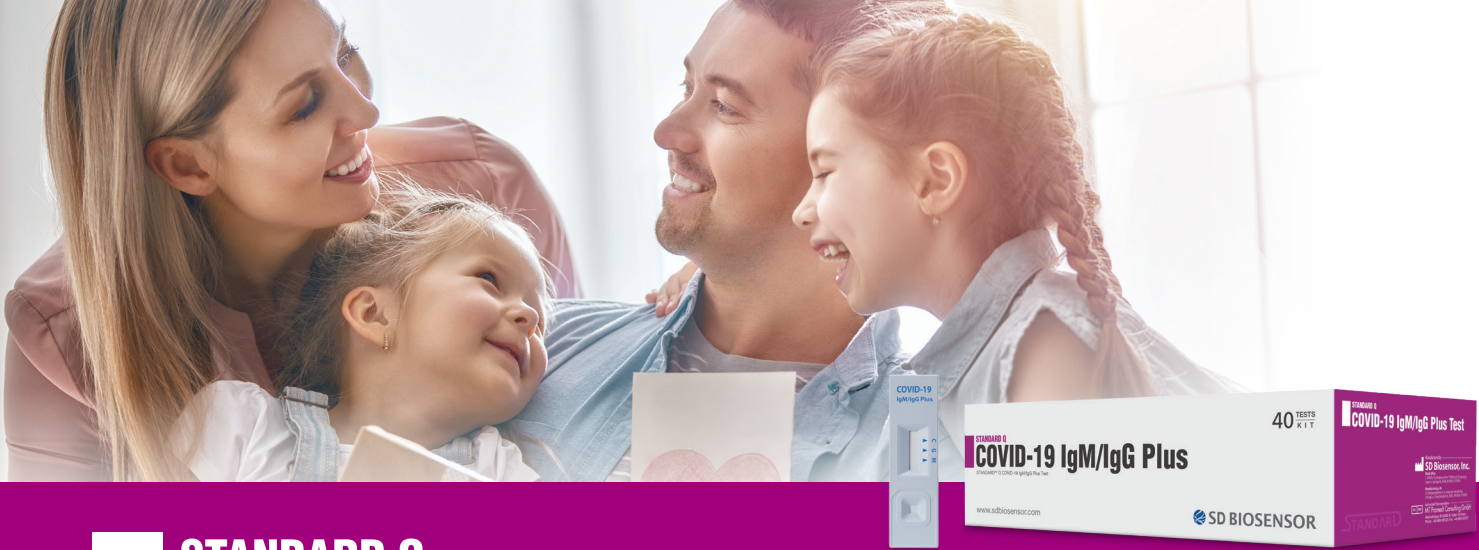

# STANDARD Q COVID-19 IgM/IgG Plus Test

- 국내 최초 KFDA 내수용 허가 승인
- 10-15분 이내 빠른 검사 결과 확인
- SARS-CoV-2 항체 신속 진단
- 집단 수준에서의 혈청학적 검사에 사용될 수 있음
- anti-NP, anti-SP 항체 진단가능
- RT-PCR의 검출 한계 이하의 SARS-CoV-2 에 감염된 이력이 있는 환자를 진단하는데 유용
- 쉽고 간편한 사용
- 97.74%의 민감도
- 98.67%의 특이도

CE IVD  
KOREA MFDS Approved

[감염 경과에 따른 사용 적합 시기]

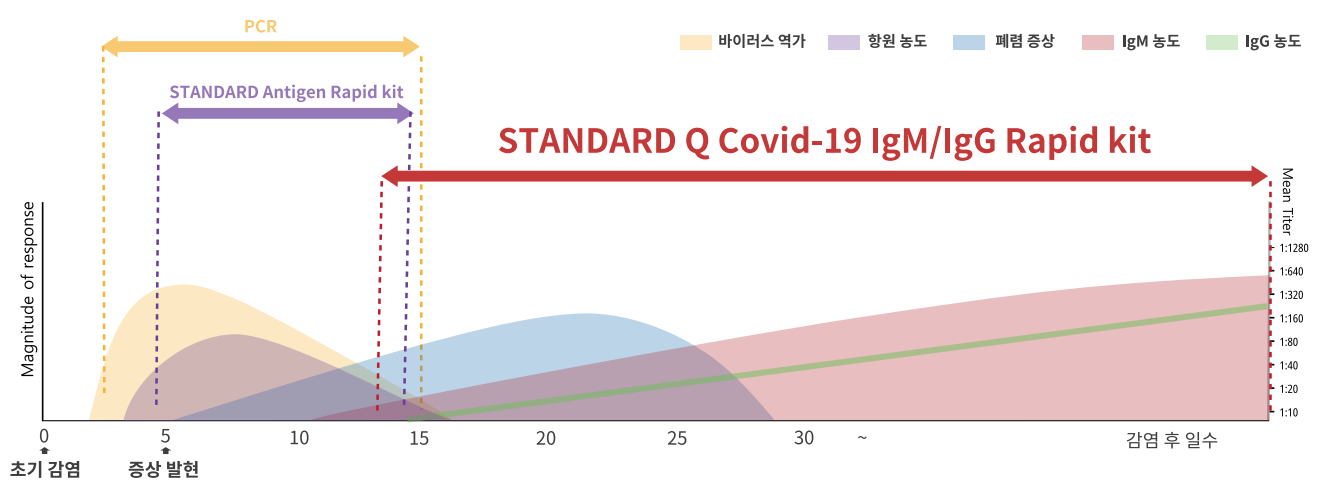

|       | 항체 검사                          | 항원 검사                       | 분자진단 검사                 |
|-------|--------------------------------|-----------------------------|-------------------------|
| 검사 목적 | COVID-19 바이러스에 대한 항체 생성여부 확인   | COVID-19 바이러스 특정 단백질 유무 확인  | COVID-19 바이러스 유전자 유무 확인 |
| 사용 검체 | 혈액                             | 코 또는 목의 점액                  | 코 또는 목의 점액, 가래 (객담)     |
| 검사 시간 | 약 15분                          | 약 30분                       | 약 3-6시간                 |
| 장점    | 과거 감염이력 확인 가능<br>검사시간 짧고 비용 낮음 | 유전자 검사 대비<br>검사 시간 짧고 비용 낮음 | 정확도가 높아 확진용으로 사용        |
| 자사제품  | STANDARD Q COVID-19 항체 검사      | STANDARD Q COVID-19 항원 검사   | STANDARD M nCoV 분자진단검사  |

표 내용 출처 : 식품안전의약처

[그래프 내용 출처]

1. Cellular immune responses to severe acute respiratory syndrome coronavirus infection in senescent BALB/c Mice:CD4+ T cells are important in control of SARD-CoV infection.
2. Chronological evolution of IgM, IgA, IgG and neutralization antibodies after infection with SARD-Associated coronavirus.
3. Mechanisms of Host defense following severe acute respiratory syndrome-coronavirus pulmonary infection of mice.
4. SARS immunity and vaccination.

## 검사 절차

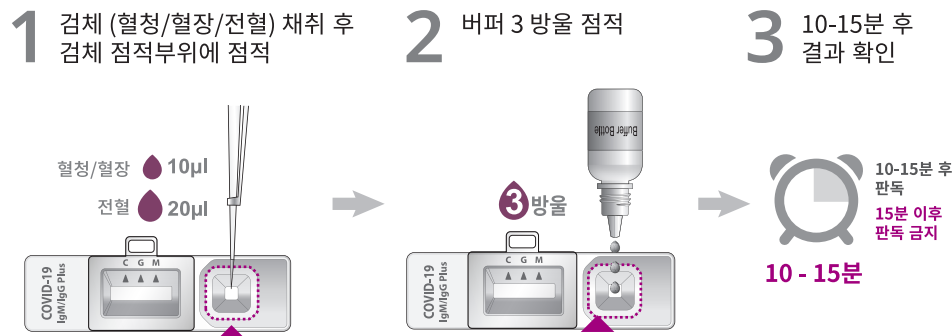

## 결과 해석

|     |  |
|-----|--|
| 음성  |  |
| 양성  |  |
| 재시험 |  |

## 임상 결과

### ■ 임상적 민감도 및 임상적 특이도

본 임상적 성능시험과 관계없이 코로나19가 의심되어 임상 평가 기관에 내원하고 긴급사용승인된 RT-PCR로 양성으로 확인된 환자에서 채취한 잔여 혈청 검체 133개와 음성으로 확인된 잔여검체 150개를 대상으로 신청제품의 임상적 민감도 및 임상적 특이도를 확인한 결과는 다음과 같습니다.

#### 1) IgM+IgG 결과 (\*IgM과 IgG 중 하나라도 양성일 경우 양성으로 판정)

|                                  |          | 긴급사용승인된 RT-PCR 시험결과                          |          |       |
|----------------------------------|----------|----------------------------------------------|----------|-------|
|                                  |          | Positive                                     | Negative | Total |
| STANDARD Q COVID-19 IgM/IgG Plus | Positive | 130                                          | 2        | 132   |
|                                  | Negative | 3                                            | 148      | 151   |
|                                  | Total    | 133                                          | 150      | 283   |
| 임상적 민감도 (Sensitivity)            |          | 97.74% (130/133) [95% 신뢰구간: 93.55% - 99.53%] |          |       |
| 임상적 특이도 (Specificity)            |          | 98.67% (148/150) [95% 신뢰구간: 95.27% - 99.84%] |          |       |

#### 2) IgM 결과

|                                  |          | 긴급사용승인된 RT-PCR 시험결과                            |              |       |
|----------------------------------|----------|------------------------------------------------|--------------|-------|
|                                  |          | IgM Positive                                   | IgM Negative | Total |
| STANDARD Q COVID-19 IgM/IgG Plus | Positive | 125                                            | 0            | 125   |
|                                  | Negative | 8                                              | 150          | 158   |
|                                  | Total    | 133                                            | 150          | 283   |
| 임상적 민감도 (Sensitivity)            |          | 93.98% (125/133) [95% 신뢰구간: 88.49% - 97.37%]   |              |       |
| 임상적 특이도 (Specificity)            |          | 100.00% (150/150) [95% 신뢰구간: 97.57% - 100.00%] |              |       |

#### 3) IgG 결과

|                                  |          | 긴급사용승인된 RT-PCR 시험결과                          |              |       |
|----------------------------------|----------|----------------------------------------------|--------------|-------|
|                                  |          | IgG Positive                                 | IgG Negative | Total |
| STANDARD Q COVID-19 IgM/IgG Plus | Positive | 127                                          | 2            | 129   |
|                                  | Negative | 6                                            | 148          | 154   |
|                                  | Total    | 133                                          | 150          | 283   |
| 임상적 민감도 (Sensitivity)            |          | 95.49% (127/133) [95% 신뢰구간: 90.44% - 98.33%] |              |       |
| 임상적 특이도 (Specificity)            |          | 98.67% (148/150) [95% 신뢰구간: 95.27% - 99.84%] |              |       |

### ■ 검체 채취기간별 임상적 민감도

본 임상적 성능시험과 관계없이 코로나19가 의심되어 임상 평가 기관에 내원하고 긴급사용승인된 RT-PCR로 양성으로 확인된 환자에서 채취한 잔여 혈청 검체 133개를 대상으로 검체 채취 기간별 임상적 민감도를 분석한 결과는 다음과 같습니다.

#### 1) IgM+IgG 결과

| 증상발현 후 검체 채취 시점까지 기간 | 민감도           |
|----------------------|---------------|
| < 7일                 | 78.6% (11/14) |
| 7 ~ 14일              | 100.0%(30/30) |
| > 14일                | 100%(89/89)   |

#### 2) IgM 결과

| 증상발현 후 검체 채취 시점까지 기간 | 민감도           |
|----------------------|---------------|
| < 7일                 | 78.6% (11/14) |
| 7 ~ 14일              | 100%(30/30)   |
| > 14일                | 94.4%(84/89)  |

#### 3) IgG 결과

| 증상발현 후 검체 채취 시점까지 기간 | 민감도           |
|----------------------|---------------|
| < 7일                 | 78.6% (11/14) |
| 7 ~ 14일              | 96.7%(29/30)  |
| > 14일                | 97.8%(87/89)  |

\*IgM과 IgG 중 하나라도 양성일 경우 양성으로 판정

## 주문 정보

| Cat No.  | 제품                                    | Test/ Kit | Kit/ Carton |
|----------|---------------------------------------|-----------|-------------|
| 09COV70G | STANDARD Q COVID-19 IgM/IgG Plus Test | 40        | 40          |
