# Supplementary material for: Validity of Rapid Antibody Testing for COVID-19 Vaccine in Homeless People
Source: Viruses. 2023 Jun 20;15(6):1400. doi: 10.3390/v15061400 (PMC10305635; doi:10.3390/v15061400)
Supplement: Supplementary file 1 [file viruses-15-01400-s001.zip › Supplement S3.xlsx]

## Sheet: Rawdata of validity
	a	b	c	d	Sensitivity	Specificity	Positive predictability	Negative predictability	False positive rate	False negative rate	Accuracy	Sample	sensitivity 95% CI	specificity 95% CI	Positive predictability 95% CI	Negative predictability 95% CI	Accuracy 95% CI	Prevalence	Prevalence 95% CI
Total people	272	1	269	8	50.2773	88.8889	99.6337	2.88809	11.1111	49.7227	50.9091	550	45.98-54.57	51.75-99.72	97.72-99.94	2.27-3.66	46.64-55.16	98.36	96.92-99.25
Homeless people	183	1	238	8	43.4679	88.8889	99.4565	3.25203	11.1111	56.5321	44.4186	430	38.67-48.35	51.75-99.72	96.64-99.91	2.56-4.12	39.66-49.26	97.91	96.06-99.04
Facility worker	89	0	31	0	74.1667	#DIV/0!	100	0	#DIV/0!	25.8333	74.1667	120	65.38-81.72					100	96.97-100
Female	a	b	c	d	Sensitivity	Specificity	Positive predictability	Negative predictability	False positive rate	False negative rate	Efficacy	Sample
Total people	32	0	17	0	65.3061	#DIV/0!	100	0	#DIV/0!	34.6939	65.3061	49	50.36-78.33					100	92.75-100
Homeless people	0	0	0	0	#DIV/0!	#DIV/0!	#DIV/0!	#DIV/0!	#DIV/0!	#DIV/0!	#DIV/0!	0
Facility worker	32	0	17	0	65.3061	#DIV/0!	100	0	#DIV/0!	34.6939	65.3061	49	50.36-78.33					100	92.75-100
Male	a	b	c	d	Sensitivity	Specificity	Positive predictability	Negative predictability	False positive rate	False negative rate	Efficacy	Sample
Total people	240	1	252	8	48.7805	88.8889	99.5851	3.07692	11.1111	51.2195	49.501	501	44.28-53.29	51.75-99.72	97.42-99.93	2.42-3.90	45.04-53.97	98.2	96.62-99.18
Homeless people	183	1	238	8	43.4679	88.8889	99.4565	3.25203	11.1111	56.5321	44.4186	430	38.67-48.35	51.75-99.72	96.64-99.91	2.56-4.12	39.66-49.26	97.91	96.06-99.04
Facility worker	57	0	14	0	80.2817	#DIV/0!	100	0	#DIV/0!	19.7183	80.2817	71	69.14-88.78					100	94.94-100
Total people age	a	b	c	d	Sensitivity	Specificity	Positive predictability	Negative predictability	False positive rate	False negative rate	Efficacy	Sample
Age < 65	211	0	155	3	57.6503	100	100	1.89873	0	42.3497	57.9946	369	52.41-62.77	29.24-100		1.69-2.13	52.78-63.08	99.19	97.64-99.83
Age ≥ 65	61	1	113	5	35.0575	83.3333	98.3871	4.23729	16.6667	64.9425	36.6667	180	27.99-42.64	35.88-99.58	90.97-99.73	2.95-6.04	29.62-44.16	96.67	92.89-98.77
BMI	a	b	c	d	Sensitivity	Specificity	Positive predictability	Negative predictability	False positive rate	False negative rate	Efficacy	Sample
Total people : Normal	238	1	230	8	50.8547	88.8889	99.5816	3.36134	11.1111	49.1453	51.5723	477	46.23-55.47	51.75-99.72	97.40-99.93	2.64-4.27	46.98-56.14	98.11	96.45-99.13
Total people <18.5	15	0	24	0	38.4615		100	0		61.5385	38.4615	39	23.36-55.38					100	90.97-100
Total people ≥ 30	17	0	15	0	53.125		100	0		46.875	53.125	32	34.74-70.91					100	89.11-100
												548
Homologous vaccination	a	b	c	d	Sensitivity	Specificity	Positive predictability	Negative predictability	False positive rate	False negative rate	Efficacy	Sample
Total people	199	1	259	8	43.4498	88.8889	99.5	2.99625	11.1111	56.5502	44.3255	467	38.86-48.13	51.75-99.72	96.90-99.92	2.36-3.79	39.76-48.96	98.07	96.37-99.12
Homeless people	142	1	232	8	37.9679	88.8889	99.3007	3.33333	11.1111	62.0321	39.1645	383	33.03-43.10	51.75-99.72	95.7-99.89	2.63-4.22	34.25-44.25	97.65	95.59-98.92
Facility worker	57	0	27	0	67.8571	#DIV/0!	100	0	#DIV/0!	32.1429	67.8571	84	56.78-77.64					100	95.70-100
Heterologous vaccination	a	b	c	d	Sensitivity	Specificity	Positive predictability	Negative predictability	False positive rate	False negative rate	Efficacy	Sample
Total people	73	0	10	0	87.9518	#DIV/0!	100	0	#DIV/0!	12.0482	87.9518	83	78.96-94.07					100	95.65-100
Homeless people	41	0	6	0	87.234	#DIV/0!	100	0	#DIV/0!	12.766	87.234	47	74.26-95.17					100	92.45-100
Facility worker	32	0	4	0	88.8889	#DIV/0!	100	0	#DIV/0!	11.1111	88.8889	36	73.94-96.89					100	90.26-100
No comorbidity	a	b	c	d	Sensitivity	Specificity	Positive predictability	Negative predictability	False positive rate	False negative rate	Efficacy	Sample
Total people	106	0	52	2	67.0886	100	100	3.7037	0	32.9114	67.5	160	59.18-74.35	15.81-100		2.99-4.58	59.66-74.68	98.75	95.56-99.85
Homeless people	47	0	35	2	57.3171	100	100	5.40541	0	42.6829	58.3333	84	45.91-68.18	15.81-100		4.26-6.84	47.06-69	97.62	91.66-99.71
Facility worker	59	0	17	0	77.6316	#DIV/0!	100	0	#DIV/0!	22.3684	77.6316	76	66.62-86.40					100	95.26-100
Comorbidity	a	b	c	d	Sensitivity	Specificity	Positive predictability	Negative predictability	False positive rate	False negative rate	Efficacy	Sample
Total people	166	1	217	6	43.342	85.7143	99.4012	2.69058	14.2857	56.658	44.1026	390	38.32-48.47	42.13-99.64	96.42-99.90	1.98-3.65	39.11-49.19	98.21	96.34-99.28
Homeless people	136	1	203	6	40.118	85.7143	99.2701	2.87081	14.2857	59.882	41.0405	346	34.86-45.55	42.13-99.64	95.66-99.88	2.11-3.89	35.81-46.43	97.98	95.88-99.18
Facility worker	30	0	14	0	68.1818	#DIV/0!	100	0	#DIV/0!	31.8182	68.1818	44	52.42-81.39					100	91.96-100

## Sheet: comobidity
		a	b	c	d	Sensitivity	Specificity	Positive predictability	Negative predictability	False positive rate	False negative rate	Accuracy	Sample	550	sensitivity 95% CI	specificity 95% CI	Positive predictability 95% CI	Negative predictability 95% CI	Accuracy 95% CI	Prevalence	Prevalence 95% CI
HTN	No	195	1	158	6	55.2408	85.7143	99.4898	3.65854	14.2857	44.7592	55.8333	360		49.89-60.51	42.13-99.64	96.94-99.92	2.67-4.99	50.53-61.04	98.06	96.03-99.21
HTN	Yes	77	0	111	2	40.9574	100	100	1.76991	0	59.0426	41.5789	190		33.86-48.35	15.81-100		1.57-1.99	34.49-48.94	98.95	96.25-99.87
DM	No	248	0	223	6	52.6539	100	100	2.62009	0	47.3461	53.2495	477		48.03-57.24	54.07-100		2.39-2.87	48.66-57.80	98.74	97.28-99.54
DM	Yes	24	1	46	2	34.2857	66.6667	96	4.16667	33.3333	65.7143	35.6164	73		23.35-46.60	9.43-99.16	82.42-99.19	1.88-8.97	24.75-47.69	95.89	88.46-99.14
DMC	No	271	1	267	8	50.3717	88.8889	99.6324	2.90909	11.1111	49.6283	51.0055	547		46.06-54.68	51.75-99.72	97.71-99.94	2.29-3.69	46.73-55.27	98.35	96.90-99.24
DMC	Yes	1	0	2	0	33.3333		100	0		66.6667		3		0.84-90.57					100	29.24-100
Hlipid	No	238	1	231	8	50.7463	88.8889	99.5816	3.34728	11.1111	49.2537	51.4644	478		46.12-55.36	51.75-99.72	97.40-99.93	2.63-4.25	46.88-56.03	98.12	96.46-99.14
Hlipid	Yes	34	0	38	0	47.2222		100	0		52.7778		82		35.33-59.35					100	95.01-100
Cancer	No	265	1	253	8	51.1583	88.8889	99.6241	3.06513	11.1111	48.8417	51.8027	527		46.76-55.54	51.75-99.72	97.66-99.94	2.41-3.89	47.44-56.14	98.29	96.78-99.22
Cancer	Yes	7	0	16	0	30.4348		100	0		69.5652		23		13.21- 52.92					100	85.18- 100
Liver	No	255	1	248	8	50.6958	88.8889	99.6094	3.125	11.1111	49.3042	51.3672	512		46.23-55.15	51.75-99.72	97.57-99.94	2.46-3.97	46.94-55.78	98.24	96.69-99.19
Liver	Yes	17	0	21	0	44.7368		100	0		55.2632		38		28.62-61.70					100	90.75-100
livercirrhosis	No	271	1	265	8	50.5597	88.8889	99.6324	2.9304	11.1111	49.4403	51.1927	545		46.24-54.87	51.75-99.72	97.71-99.94	2.31-3.72	46.91-55.46	98.35	96.89-99.24
livercirrhosis	Yes	1	0	4	0	20		100	0		80		5		0.51-71.64					100	47.82-100
CTD	No	251	1	236	7	51.54	87.5	99.6032	2.88066	12.5	48.46	52.1212	495		47-56.06	47.35-99.68	97.56-99.94	2.2-3.77	47.62-56.60	98.38	96.84-99.30
CTD	Yes	21	0	33	1	38.8889	100	100	2.94118	0	61.1111	40	55		25.92-53.12	2.5-100		2.39-3.61	27.02-54.09	98.18	90.28-99.95
Stroke	No	263	1	254	7	50.8704	87.5	99.6212	2.68199	12.5	49.1296	51.4286	525		46.47-55.26	51.75-99.72	97.64-99.94	2.4-3.88	47.16-55.87	98.29	96.78-99.21
Stroke	Yes	9	0	15	1	37.5	100	100	6.25	0	62.5	40	25		18.80-59.41	2.5-100		4.66-8.33	21.13-61.33	96	79.65-99.9
Hemiplegia	No	265	1	254	8	51.0597	88.8889	99.6241	3.05344	11.1111	48.9403	51.7045	528		46.67-55.44	51.75-99.72	97.66-99.94	2.4-3.88	47.35-56.04	98.3	96.79-99.22
Hemiplegia	Yes	7	0	15	0	31.8182		100	0		68.1818		22		13.86-54.87					100	13.86-54.87
GI	No	248	1	228	7	52.1008	87.5	99.5984	2.97872	12.5	47.8992	52.686	484		47.51-56.67	47.35-99.68	97.53-99.94	2.27-3.90	48.13-57.21	98.35	96.77-99.28
GI	Yes	24	0	41	1	36.9231	100	100	2.38095	0	63.0769	37.8788	66		25.28-49.8	2.5-100		1.98-2.85	26.22-50.66	98.48	91.84-99.96
Heart	No	268	1	264	7	50.3759	87.5	99.6283	2.58303	12.5	49.6241	50.9259	540		46.04-54.71	47.35-99.68	97.71-99.94	1.97-3.37	46.62-55.22	98.52	97.1-99.36
Heart	Yes	4	0	5	1	44.4444	100	100	16.6667	0	55.5556	50	10		13.7-78.8	2.5-100		10.03-26.40	18.71-81.29	90	55.5-99.75
Kidney	No	271	1	264	6	50.6542	85.7143	99.6324	2.22222	14.2857	49.3458	51.107	542		46.33-54.97	42.13-99.64	97.78-99.94	1.63-3.02	46.81-55.39	98.71	97.36-99.48
Kidney	Yes	1	0	5	2	16.6667	100	100	28.5714	0	83.3333	37.5	8		0.42-64.12	15.81-100		21.86-36.39	8.52-75.51	75	34.91-96.81
Pulmonary	No	259	1	253	7	50.5859	87.5	99.6154	2.69231	12.5	49.4141	51.1538	520		46.17-55	47.35-99.68	97.64-99.94	2.06-3.52	46.77-55.53	98.46	96.99-99.33
Pulmonary	Yes	13	0	16	1	44.8276	100	100	5.88235	0	55.1724	46.6667	30		26.45-64.31	2.5-100		4.31-7.98	28.34-65.67	96.67	82.78-99.92
Psychiatic	No	260	1	249	7	51.0806	87.5	99.6169	2.73438	12.5	48.9194	51.6441	517		46.64-55.5	47.35-99.68	97.65-99.94	2.09-3.57	47.24-56.03	98.45	96.97-99.33
Psychiatic	Yes	12	0	20	1	37.5	100	100	4.7619	0	62.5	39.3939	33		21.1-56.31	2.5-100		3.68-6.14	22.91-57.86	96.97	84.24-99.92
urology	No	241	1	209	5	53.5556	83.3333	99.5868	2.33645	16.6667	46.4444	53.9474	456		48.83-58.24	35.88-99.58	97.57-99.93	1.62-3.35	49.25-58.59	98.68	97.16-99.52
urology	Yes	31	0	60	3	34.0659	100	100	4.7619	0	65.9341	36.1702	94		24.45-44.75	29.24-100		4.14-5.48	26.51-46.73	96.81	90.96-99.34
eye	No	259	1	257	8	50.1938	88.8889	99.6154	3.01887	11.1111	49.8062	50.8571	525		45.79-54.59	51.75-99.72	97.60-99.94	2.37-3.83	46.49-55.21	98.29	96.77-99.21
eye	Yes	13	0	12	0	52		100	0		48		25		31.31-72.20					100	86.28- 100
endo	No	269	1	264	7	50.469	87.5	99.6296	2.58303	12.5	49.531	51.0166	541		46.14-54.79	47.35-99.68	97.72-99.94	1.97-3.37	46.72-55.31	98.52	97.11-99.36
endo	Yes	3	0	5	1	37.5	100	100	16.6667	0	62.5	44.4444	9		8.52-75.51	2.50-100		10.47-25.49	13.7-78.8	88.89	51.75-99.72
skin	No	269	1	267	8	50.1866	88.8889	99.6296	2.90909	11.1111	49.8134	50.8257	545		45.87-54.5	51.75-99.72	97.69-99.94	2.29-3.69	46.54-55.1	98.35	96.89-99.24
skin	Yes	3	0	2	0	60		100	0		40		5		14.66-94.73					100	47.82-100
etccomorbidity	No	256	1	230	7	52.6749	87.5	99.6109	2.95359	12.5	47.3251	53.2389	494		48.13-57.19	47.35-99.68	97.61-99.94	2.25-3.86	48.73-57.71	98.38	96.83-99.30
etccomorbidity	Yes	16	0	39	1	29.0909	100	100	2.5	0	70.9091	30.3571	56		17.63-42.90	2.50-100		2.12-2.95	18.78-44.1	98.21	90.45-99.95
cci	0	176	0	115	3	60.4811	100	100	2.54237	0	39.5189	60.8844	294		54.61-66.14	29.24-100		2.21-2.92	55.05-66.50	98.98	97.05-99.79
	1	56	1	75	1	42.7481	50	98.2456	1.31579	50	57.2519	42.8571	133		34.15-51.68	1.26-98.74	93.25-99.56	0.33-5.10	34.32-51.72	98.5	94.67-99.82
	2	26	0	45	3	36.6197	100	100	6.25	0	63.3803	39.1892	74		25.5-48.9	29.24-100		5.29-7.37	28.04-51.23	95.95	88.61-99.16
	3	9	0	22	0	29.0323		100	0		70.9677		31		14.22-48.04					100	88.78-100
	4	2	0	7	0	22.2222		100	0		77.7778		9		2.81-60.01					100	66.37-100
	5	2	0	4	1	33.3333	100	100	20	0	66.6667	42.8571	7		4.33-77.72	2.5-100		12.43-30.57	9.9-81.59	85.71	42.13-99.64
	6	1	0	1	0	50		100	0		50		2		1.26-98.74					100	15.81-100
													550
	CCI ≥ 4	5	0	12	1	29.4118		100	7.69231		70.5882	33.3333	18		10.31-55.96	2.5-100		5.78-10.17	13.34-59.01	94.44	72.71-99.86
	CCI ≥ 3	14	0	34	1	29.1667		100	2.85714		70.8333	30.6122	49		16.95-44.06	2.5-100		2.39-3.41	18.25-45.42	97.96	89.15-99.95

## Sheet: explain
Sensitivity: probability that a test result will be positive when the disease is present (true positive rate) = a / (a+c)*100
Specificity: probability that a test result will be negative when the disease is not present (true negative rate) = d / (b+d)*100
Positive predictive value: probability that the disease is present when the test is positive = a / (a+b)*100
Negative predictive value: probability that the disease is not present when the test is negative = d / (c+d) *100
Accuracy: overall probability that a patient is correctly classified.
= Sensitivity × Prevalence + Specificity × (1 − Prevalence)
Confidence intervals for sensitivity, specificity and accuracy are "exact" Clopper-Pearson confidence intervals.
Confidence intervals for the predictive values are the standard logit confidence intervals given by Mercaldo et al. 2007.
How to cite this page
MedCalc Software Ltd. Diagnostic test evaluation calculator. https://www.medcalc.org/calc/diagnostic_test.php (Version 20.106; accessed April 27, 2022)
Literature
Altman DG, Machin D, Bryant TN, Gardner MJ (Eds) (2000) Statistics with confidence, 2nd ed. BMJ Books.
CL-ELISA positive rate	549	550	0.998182
Rapid antibody positive rate include a 1 case of rapid antibody positive (+) & CL ELISA(-)	273	550	0.496364
Rapid antibody test positive and CELISA negative rate (n=1)	1	550	0.00181818
	CL_ELISA(+)	CL_ELISA(-)
Rapid serological antibody test (+)	a	b
Rapid serological antibody test (-)	c	d
